# Supplementary material for: Characterization of mitochondrial health from human peripheral blood mononuclear cells to cerebral organoids derived from induced pluripotent stem cells
Source: PubMed Central journal article supplement (PMC7907388; doi:10.1038/s41598-021-84071-6), 2021-02-25
Supplement: 41598_2021_84071_MOESM1_ESM.pdf [file 41598_2021_84071_MOESM1_ESM.pdf]

## Supplementary Information for

### Characterization of mitochondrial health from human peripheral blood mononuclear cells to cerebral organoids derived from induced pluripotent stem cells

Angela Duong<sup>1,2</sup>, Alesya Evstratova<sup>1</sup>, Adam Sivitilli<sup>3</sup>, J. Javier Hernandez<sup>4,5</sup>, Jessica Gosio<sup>4,5</sup>, Azizia Wahedi<sup>6</sup>, Neal Sondheimer<sup>4,6</sup>, Jeff L. Wrana<sup>4,5</sup>, Jean-Martin Beaulieu<sup>1\*</sup>, Liliana Attisano<sup>3,6\*</sup>, Ana C. Andreazza<sup>1,2,7\*</sup>.

<sup>1</sup>Department of Pharmacology and Toxicology, University of Toronto, Toronto, ON, M5S 1A8, Canada.

<sup>2</sup>Centre for Addiction and Mental Health, Toronto, ON, M5T 1R8, Canada.

<sup>3</sup>Department of Biochemistry, University of Toronto, Toronto, ON, M5S 1A8, Canada.

<sup>4</sup>Department of Molecular Genetics, University of Toronto, Toronto, ON, M5S 1A8, Canada.

<sup>5</sup>Lunenfeld-Tanenbaum Research Institute, Toronto, ON, M5G 1X5, Canada.

<sup>6</sup>Program in Genetics and Genome Biology, Peter Gilgan Centre for Research and Learning, The Hospital for Sick Children, Toronto, ON, M5G 0A4, Canada.

<sup>7</sup>Donnelly Centre for Cellular and Biomolecular Research, University of Toronto, Toronto, ON, M5S 3E1, Canada.

<sup>8</sup>Department of Psychiatry, University of Toronto, Toronto, ON, M5S 1A8, Canada.

\*Correspondence to: martin.beaulieu@utoronto.ca (J.M.B.); liliana.attisano@utoronto.ca (L.A.); ana.andreazza@utoronto.ca (A.C.A.)

#### **This PDF file includes:**

Tables S1 to S11

Figures S1 to S2

| Clinical and Demographic Characteristics |               |
|------------------------------------------|---------------|
| Sample Identification                    | MS005-2014    |
| Sample Type                              | Whole Blood   |
| Informed consent                         | Yes           |
| Age                                      | 33            |
| Sex                                      | Female        |
| BMI                                      | 24.6          |
| Medication                               | None reported |
| Ethnicity                                | Caucasian     |
| BP                                       | 120/92        |

**Table S1. Clinical and demographic characteristics of the donor.** BMI, body mass index; BP, blood pressure.

|              | Antigen              | Host   | Dilution | Source         | Identifier |
|--------------|----------------------|--------|----------|----------------|------------|
| iPSC         | OCT4                 | Rabbit | 1:400    | Invitrogen     | A24867     |
|              | SOX2                 | Rat    | 1:100    | Invitrogen     | A24759     |
|              | SSEA4                | Mouse  | 1:100    | Invitrogen     | A24866     |
|              | TRA-1-60             | Mouse  | 1:100    | Invitrogen     | A24868     |
| CO           | SOX2                 | Goat   | 3:200    | R&D            | AF2018     |
|              | NeuN                 | Rabbit | 1:500    | Cell Signaling | 12943S     |
| Mitochondria | TOMM-20              | Rabbit | 1:100    | Abcam          | ab186734   |
|              | NDUFS3               | Mouse  | 1:100    | Abcam          | ab110246   |
|              | SDHA                 | Mouse  | 1:200    | Abcam          | ab14715    |
|              | UQCRC1               | Mouse  | 1:50     | Abcam          | ab110246   |
|              | COXIV                | Mouse  | 1:200    | Abcam          | ab33985    |
|              | ATP Synthase $\beta$ | Mouse  | 1:500    | Invitrogen     | A-21351    |

**Table S2. List of primary antibodies used for fluorescent immunohistochemistry**

**experiments.** OCT4, octamer-binding transcription factor 4; SOX-2, sex determining region Y-box 2; SSEA4, stage-specific embryonic antigen 4; TRA-1-60, podocalyxin; NeuN, neuronal nuclei; TOMM-20, translocase of outer mitochondrial membrane 20; NDUFS3, NADH:ubiquinone oxidoreductase core subunit S3; SDHA, succinate dehydrogenase complex flavoprotein subunit A; UQCRC1, ubiquinol-cytochrome C reductase core protein I; COXIV, cytochrome c oxidase subunit IV; ATP Synthase  $\beta$ , ATP synthase beta subunit; iPSC, induced pluripotent stem cells; CO, cerebral organoid.

|                   | iPSC CO | H9 hESC CO |
|-------------------|---------|------------|
| Electrophysiology | 4       | 4          |
| Cellular IF       | 2       | 2          |
| Mitochondria      | 8       | 8          |
| TOTAL             | 14      | 14         |

**Table S3. Total number of whole cerebral organoids produced and allocated for each assessment.** iPSC CO induced pluripotent stem cells-derived cerebral organoids; H9 hESC CO, H9 human embryonic stem cells- derived cerebral organoids; IF, immunofluorescence.

| Assessment             | Sample type            | Specific Endpoints                          | Biological Replicates | Technical Replicates |
|------------------------|------------------------|---------------------------------------------|-----------------------|----------------------|
| Characterization       | iPSC                   | Karyotype                                   | 2                     | 10                   |
|                        |                        | Alkaline phosphatase                        | 3                     | 3                    |
|                        |                        | Pluripotency validation                     | 3                     | 3                    |
|                        | H9 hESC CO and iPSC CO | Cellular characterization                   | 2                     | 2                    |
| Neuronal Activity      | H9 hESC CO and iPSC CO | Action potential                            | 4                     | 7-12                 |
|                        |                        | Spontaneous activity                        | 4                     | 4-8                  |
|                        |                        | Na <sup>+</sup> and K <sup>+</sup> currents | 4                     | 3-9                  |
| Mitochondrial Function | PBMC                   | MitoTracker                                 | 1                     | 3                    |
|                        |                        | MMP                                         | 1                     | 3                    |
|                        |                        | OXPPOS                                      | 1                     | 3                    |
|                        |                        | ATP                                         | 1                     | 3                    |
|                        |                        | mtDNA genetics                              | 1                     | 2                    |
|                        |                        | TEM                                         | 1                     | 10                   |
|                        | H9 hESCs and iPSCs     | MitoTracker                                 | 3                     | 3                    |
|                        |                        | MMP                                         | 3                     | 3                    |
|                        |                        | OXPPOS                                      | 3                     | 5                    |
|                        |                        | ATP                                         | 3                     | 2                    |
|                        |                        | mtDNA genetics                              | 3                     | 1-3                  |
|                        |                        | TEM                                         | 2                     | 10                   |
|                        | H9 hESC CO and iPSC CO | MitoTracker                                 | 3                     | 3                    |
|                        |                        | MMP                                         | 4                     | 3                    |
|                        |                        | OXPPOS                                      | 3                     | 5                    |
|                        |                        | ATP                                         | 3                     | 3                    |
|                        |                        | mtDNA genetics                              | 3                     | 1-3                  |
|                        |                        | TEM                                         | 1                     | 10                   |

**Table S4. Summary of biological and technical replicates used for each experiment.** PBMC, peripheral blood mononuclear cells; iPSC, induced pluripotent stem cells; H9 hESC, H9 human embryonic stem cells; CO, cerebral organoids; MMP, mitochondrial membrane potential; OXPPOS; oxidative phosphorylation; ATP, adenosine triphosphate; mtDNA, mitochondrial DNA; TEM, transmission electron microscopy; Na<sup>+</sup>, sodium; K<sup>+</sup>, potassium.

| PCR Primers for Sex Determination |                          | Size   |
|-----------------------------------|--------------------------|--------|
| SRY F                             | CATGAACGCATTCATCGTGTGGTC | 254 bp |
| SRY R                             | CTGCGGGAAGCAAAGCAATTCTT  |        |
| PARP F385                         | AAGCTTTCCAGGAGATCCTAAC   | 498 bp |
| PARP R882                         | CCTTCACTGTAGGTCCCAAAT    |        |

**Table S5. PCR primers used for sex determination as a quality control.** SRY, sex determining region of Y-chromosome; PARP, poly(ADP-ribose) polymerase; F, forward; R, reverse; bp, base pair.

| Sample       | PARP | SRY | Sex |
|--------------|------|-----|-----|
| PBMC         | +    | -   | F   |
| iPSC         | +    | -   | F   |
| iPSC CO      | +    | -   | F   |
| Controls     |      |     |     |
| PC – SH-SY5Y | +    | -   | F   |
| WG1669       | +    | +   | M   |

**Table S6. Sex determination as a quality control across all stages of cerebral organoid generation.** There is preservation of the female karyotype across PBMC, iPSC and iPSC CO. SH-SY5Y human female neuroblastoma cell line was used as a female control and WG1669 male patient was used as a male control. PBMC, peripheral blood mononuclear cells; iPSC, induced pluripotent stem cells; H9 hESC, H9 human embryonic stem cells; CO, cerebral organoids; PC, positive control; SH-SY5Y, human neuroblastoma cell line; SRY, sex determining region of Y-chromosome; PARP, poly(ADP-ribose) polymerase; F, female; M, male.

| Primers for mtDNA amplification for Illumina sequencing |                          |
|---------------------------------------------------------|--------------------------|
| MT-COIII F                                              | TCACAATTCTAATTCTACTGA    |
| MT-COIII R                                              | CGGATGAAGCAGATAGTGAGG    |
| MT16425 F                                               | CCGCACAAGAGTGCTACTCTCCTC |
| MT16426 R                                               | GATATTGATTCACGGAGGATGGTG |

**Table S7. Primers used for mtDNA amplification and sequencing.** MT, mitochondrial;

F, forward; R, reverse.



|         | PBMC | iPSC | iPSC-derived CO | NC - SH SY5Y |
|---------|------|------|-----------------|--------------|
| A73G    | +    | +    | +               | -            |
| A153G   | +    | +    | +               | -            |
| T195C   | +    | +    | +               | -            |
| G225A   | +    | +    | +               | -            |
| A263G   | +    | +    | +               | +            |
| A750G   | +    | +    | +               | +            |
| G769A   | +    | +    | +               | -            |
| A1438G  | +    | +    | +               | +            |
| G1719A  | +    | +    | +               | -            |
| A2706G  | +    | +    | +               | -            |
| A4769G  | +    | +    | +               | +            |
| T6221C  | +    | +    | +               | -            |
| C6371T  | +    | +    | +               | -            |
| C7028T  | +    | +    | +               | -            |
| A8860G  | +    | +    | +               | +            |
| T9722C  | +    | +    | +               | -            |
| G11719A | +    | +    | +               | -            |
| C12705T | +    | +    | +               | -            |
| G13368A | +    | +    | +               | -            |
| A13966G | +    | +    | +               | -            |
| T14470C | +    | +    | +               | -            |
| C14766T | +    | +    | +               | -            |
| A15326G | +    | +    | +               | +            |
| G15650A | +    | +    | +               | -            |
| A15924G | +    | +    | +               | -            |
| T16189C | +    | +    | +               | -            |
| C16223T | +    | +    | +               | -            |
| C16278T | +    | +    | +               | -            |
| T16519C | +    | +    | +               | +            |

**Table S8.** Mitochondrial DNA (mtDNA) variants for the X2g haplogroup across PBMCs, iPSCs and iPSC-derived COs validated by whole mtDNA sequencing and short mtDNA fragment sequencing. SH-SY5Y human neuroblastoma cell line was used as a negative control (NC), validated by only short fragment mtDNA sequencing. (+) denotes positive or presence; (-) denotes negative or absence. PBMC, peripheral blood mononuclear cells; iPSC, induced pluripotent stem cells; CO, cerebral organoids.

| PCR Primers |                         | Sequencing primers |                                                     | SNPs sequenced |         |         |
|-------------|-------------------------|--------------------|-----------------------------------------------------|----------------|---------|---------|
| F13464      | CAGCCTAGCATTAGCAGGAATA  | F14368             | CAATCCTACCTCCATCGCTAA<br>C                          | T14470C        | C14766T |         |
| R15211      | GTATGGGATGGCGGATAGTAAG  |                    |                                                     |                |         |         |
| F458        | CCTCCACTCCCATACTACTAA   | R1927              | CTTAGGTAGCTCGTCTGGTTTC                              | A1438G         | G1719A  |         |
| R1997       | GGTTTGTCGCCTCTACCTATAAA |                    |                                                     |                |         |         |
| F4708       | TCTCCGGACAATGAACCATAAC  | R5216              | GAGGAGGGTGGATGGAATTA<br>AG                          | A4769G         | C5111T  |         |
| R6882       | GTGTGGCGAGTCAGCTAAATA   | F5993              | CACAGCTCTAAGCCTCCTTATT                              | T6221C         | C6371T  |         |
| F14562      | CCACACCGCTAACAAATCAATAC | F15264             | CCACCCTCACACGATTCTTTAC                              | A15326G        | G15650A | A15924G |
| R16511      | GTAGGAACCAGATGTCGGATAC  |                    |                                                     |                |         |         |
| F8474       | CCCTCACCAAAGCCATAAA     | F8804              | CACCAACCACCAACTATCT<br>CACTCCATAACGCTCCTCATA<br>C   | A8860G         |         |         |
| R11031      | CGTGATAGTGGTTCCTGATAAG  | F9318              |                                                     | T9722C         |         |         |
| F11644      | CCTCGTAGTAACAGCCATTCTC  | R11775             | CTGTGAGTGCCTCGTAGTT                                 | G11719A        |         |         |
| R14130      | GGTTAGGATGAGTGGGAAGAAG  | F13595             | GCGCCTATAGCACTCGAATAA<br>GAGGTTGAAGTGAGAGGTATG<br>G | A13966G        |         |         |
|             |                         | R13451             |                                                     | C12705T        | G13368A |         |
| F15323      | GCAAACTCCACCTCCTATTC    | F458               | CCTCCACTCCCATACTACTA<br>A                           | A750G          | G769A   |         |
| R943        | CTCTTTACGCCGGCTTCTATT   | R16548             | GGGAACGTGTGGGCTATTTA<br>CCCACACGTTCCCTTAAATA<br>A   | T16189C        | C16223T | C16278T |
|             |                         | F16536             | CGTGAGTGGTTAATAGGGTGA<br>TAGAC                      | A73G           | A153G   | T195C   |
|             |                         | R34                |                                                     | T16519C        | G225A   | A263G   |
| F5317       | CCACCATCACCTCCTT        | F6357              | CTAGCAGGTGTCTCCTCTATCT                              | C7028T         |         |         |
| R7608       | CCTACTTGCGCTGCATGTGCC   |                    |                                                     |                |         |         |
| F1562       | GTAACATGGTAAGTGTACTG    | F2209              | GCTCAACACCCACTACCTAAA                               | A2706G         |         |         |
| R3717       | GGCTACTGCTCGCAGTG       |                    |                                                     |                |         |         |

**Table S9. PCR primers and sequencing primers used for the determination of the mitochondrial DNA haplogroup, X2g. F, forward; R, reverse; SNPs, single nucleotide polymorphisms.**

| PCR Primers for mtDNA Copy Number |              |                           |
|-----------------------------------|--------------|---------------------------|
| mtDNA                             | MT-ND1 F     | ATGGCCAACCTCCTACTCCT      |
|                                   | MT-ND1 R     | CTACAACGTTGGGGCCTTT       |
| Nuclear DNA                       | $\beta$ 2M F | TGCTGTCTCCATGTTTGATGTATCT |
|                                   | $\beta$ 2M R | TCTCTGCTCCCCACCTCTAAGT    |

**Table S10. PCR primers used for mtDNA copy number determination.** MT-ND1, mitochondrially encoded NADH:ubiquinone oxidoreductase core subunit 1;  $\beta$ 2M, Beta 2 Microglobulin; F, forward; R, reverse.

|            | Resting membrane potential (mV) |            |            | Membrane capacitance (pF) |            |            | Membrane resistance (M $\Omega$ ) |               |               |
|------------|---------------------------------|------------|------------|---------------------------|------------|------------|-----------------------------------|---------------|---------------|
|            | Type 1                          | Type 2     | Type 3     | Type 1                    | Type 2     | Type 3     | Type 1                            | Type 2        | Type 3        |
| iPSC CO    | 42 $\pm$ 2                      | 42 $\pm$ 3 | 47 $\pm$ 3 | 20 $\pm$ 3                | 29 $\pm$ 3 | 39 $\pm$ 3 | 1137 $\pm$ 214                    | 847 $\pm$ 114 | 558 $\pm$ 48  |
| H9 hESC CO | 41 $\pm$ 4                      | 47 $\pm$ 2 | 56 $\pm$ 3 | 22 $\pm$ 3                | 29 $\pm$ 3 | 32 $\pm$ 2 | 834 $\pm$ 175                     | 577 $\pm$ 74  | 574 $\pm$ 102 |

**Table S11. Electrophysiological properties of neurons from iPSC-derived CO and H9**

**hESC-derived CO.** Type 1, immature neurons; type 2, developing neurons; type 3, mature

neurons; iPSC, induced pluripotent stem cells; H9 hESC, H9 human embryonic stem cells; CO,

cerebral organoids.

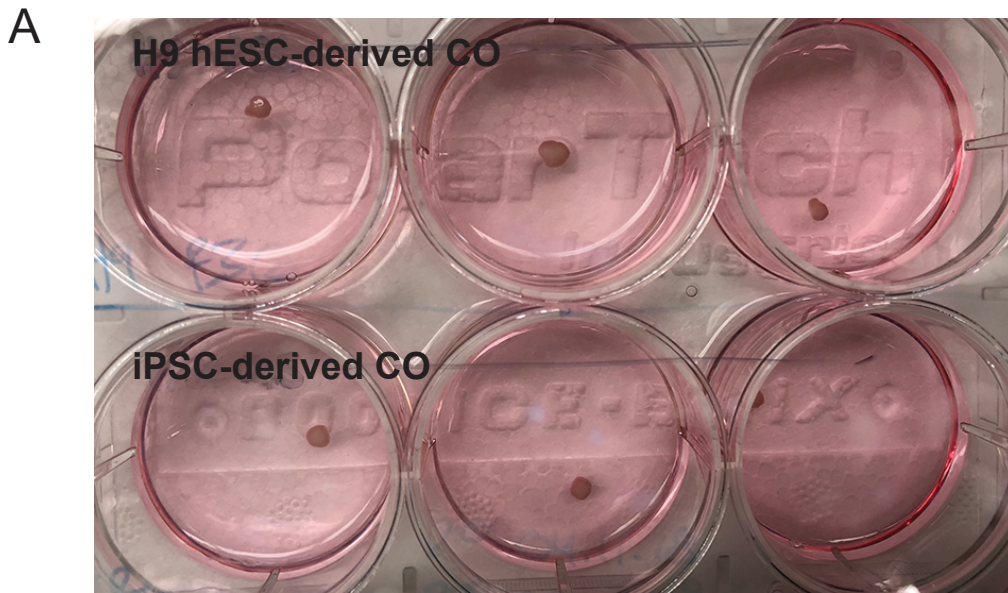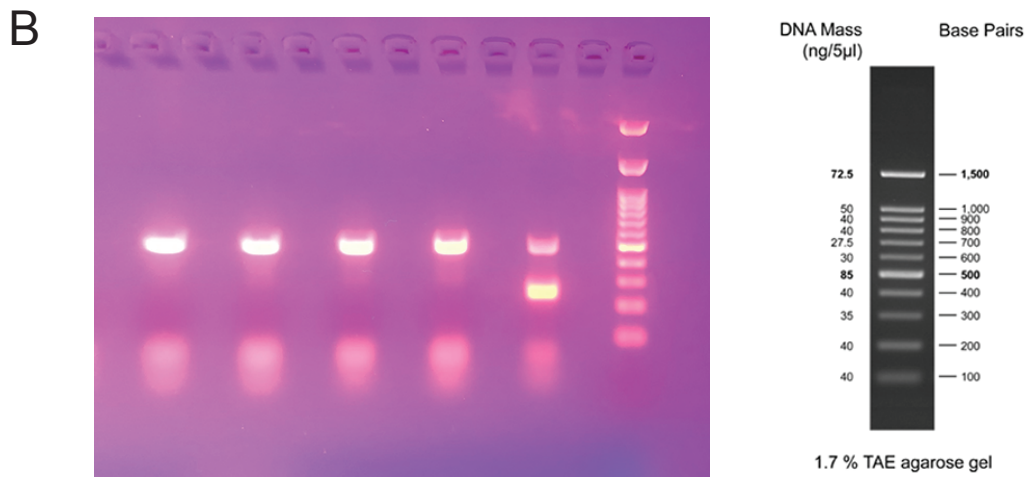

**Fig. S1. Sex determination as a quality control.** (A) Representative cerebral organoid culture in a 6-well plate, H9 hESC-derived CO (top row) and iPSC-derived CO (bottom row). (B) A representative gel image of SRY and PARP PCR products. Left to right: PBMC, iPSC, iPSC-derived CO, SH-SY5Y neuroblastoma cell line, a male control and 100bp ladder.

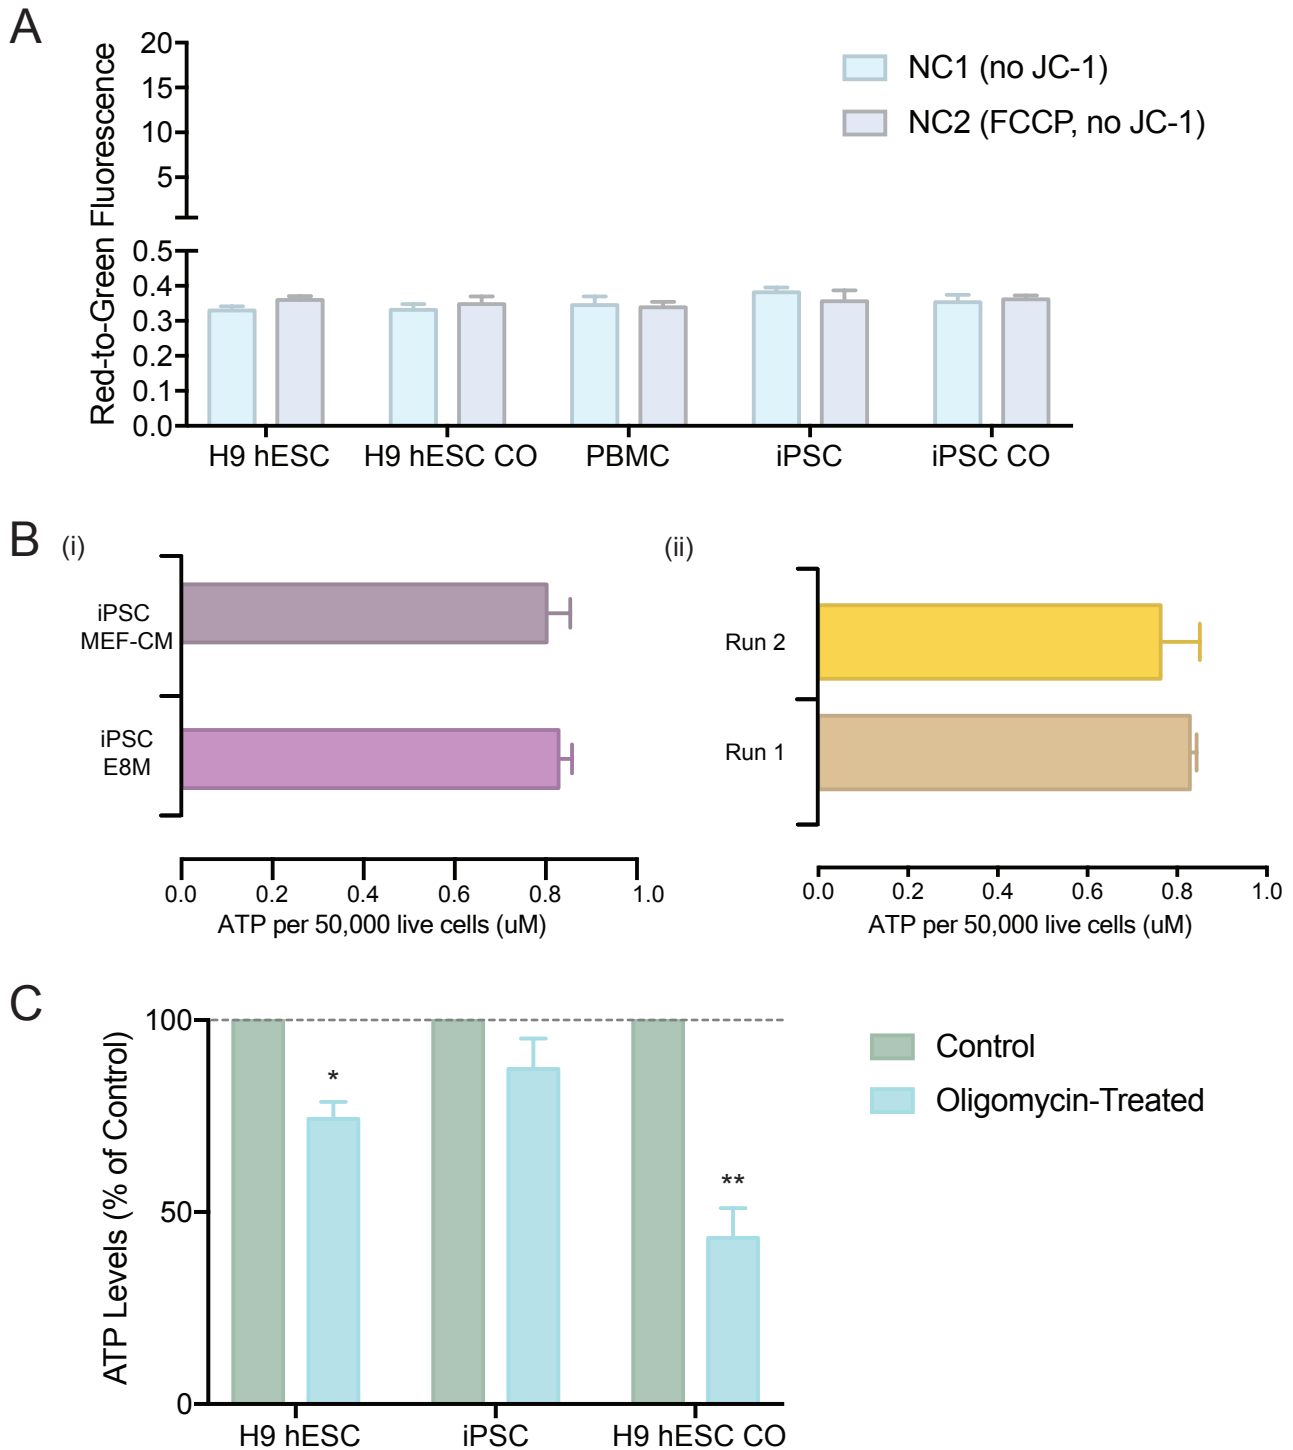

**Fig. S2. Mitochondrial function experimental quality control and proof-of-concept.** (A) Bar graph summarizing mitochondrial membrane potential as red-to-green fluorescence ratio across CO generation in samples treated without JC-1 (negative control 1, NC-1) and those treated with FCCP and without JC-1 (negative control 2, NC-2), bars, mean  $\pm$  SD. (B) Bar graph showing intracellular ATP levels in iPSCs cultured in Mouse Embryonic Fibroblast (MEF)-Conditioned Media and Essential 8 Media. bars, mean  $\pm$  SD (i). Bar graph showing the intracellular ATP levels in iPSCs in two independent experimental runs, bars, mean  $\pm$  SD (ii). (C) Bar graph showing ATP levels expressed as percent of control in H9 hESCs, iPSCs and H9 hESC COs treated with oligomycin, bars, mean  $\pm$  SD. \* $p < 0.01$ ; \*\* $p < 0.001$ . *P*-values were determined using the independent samples *t*-test.
